# Supplementary material for: Interface Interactions in Conjugated Polymer Composite with Metal Oxide Nanoparticles
Source: PubMed Central journal article supplement (PMC6915360; doi:10.3390/nano9111534), 2019-10-29
Supplement: nanomaterials-09-01534-s001.pdf [file nanomaterials-09-01534-s001.pdf]

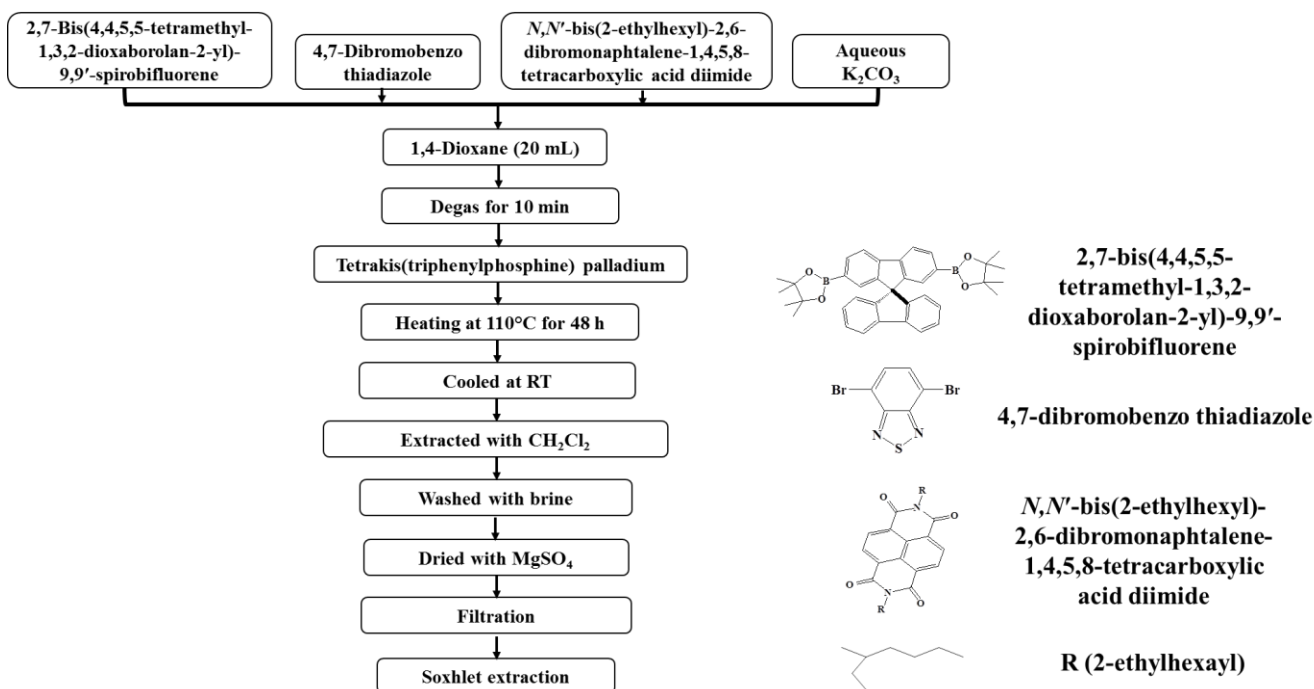

Figure S1 The schematic picture of the polymer synthesis procedure. The chemical formulas of polymers are also shown .

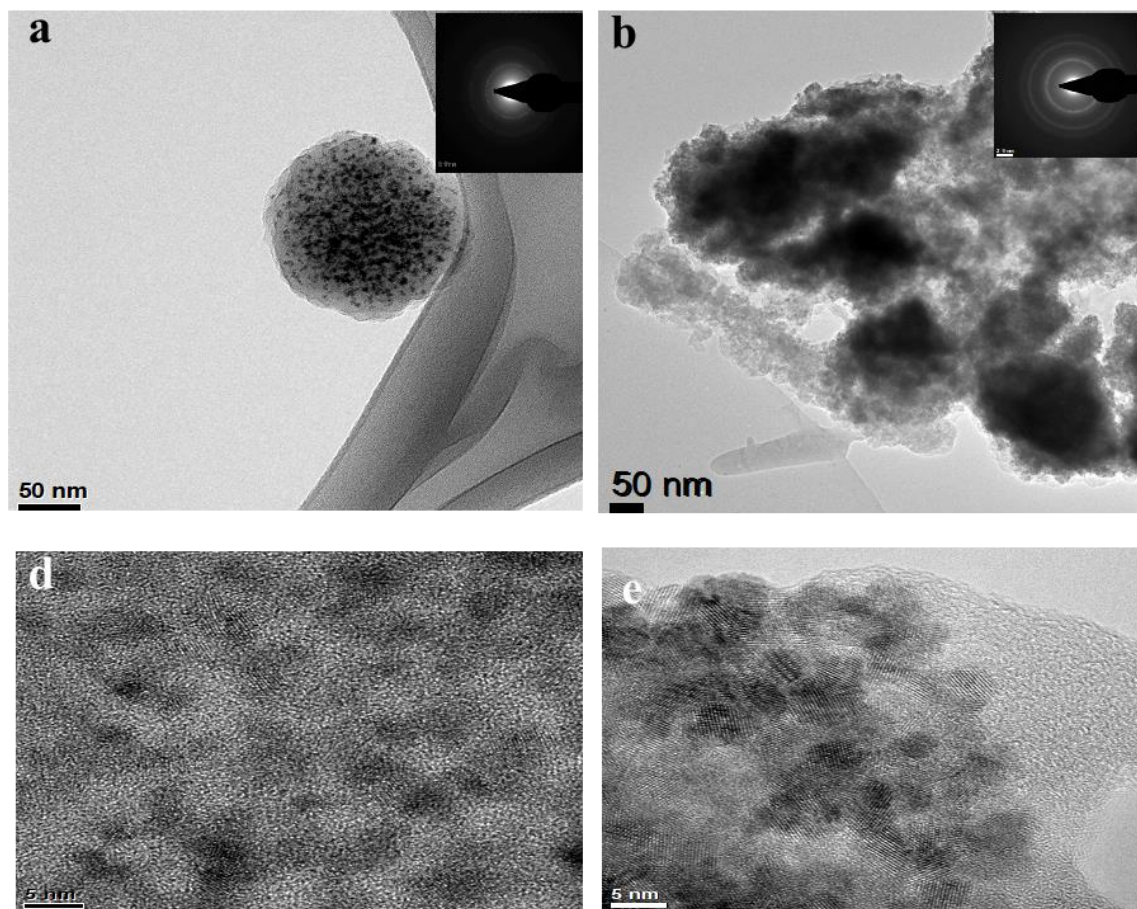

Figure S2 TEM investigation of polymer composite with different amount of CeO<sub>2</sub>, (a) bright image of composite with 20wt% CeO<sub>2</sub>, (b) bright image of composite with 50wt% CeO<sub>2</sub>, (c) HRTEM of composite with 20wt% CeO<sub>2</sub>, (d) HRTEM of composite with 50wt% CeO<sub>2</sub>. The insert figures were corresponding diffraction patterns. Aggregation of nanoparticles was observed in composite with 50wt% CeO<sub>2</sub>.
